# Supplementary material for: Machine Learning in Modeling of Mouse Behavior
Source: Frontiers journal article supplement (doi:10.3389/fnins.2021.700253), 2021-09-14
Supplement: Table_1.PDF [file Table_1.PDF]

**Supplemental Table 1. Definition of detected behavioral activities.**

| Activity                          | Definition                                                                                                                                                | Abbreviation                 |
|-----------------------------------|-----------------------------------------------------------------------------------------------------------------------------------------------------------|------------------------------|
| Awaken                            | Any movement from sleep that starts and continues without resumption of sleep                                                                             | Awaken                       |
| Chew                              | Any brief period during eating where the mouth detaches from the food                                                                                     | Chew                         |
| Come down                         | Any movement of the animal from a fully reared position to a position                                                                                     | Come Down                    |
| Come down from partially reared   | Any movement of the animal from a partially reared up position to a low level                                                                             | Come Down from PR            |
| Come down to partially reared     | Any movement of the animal from a fully reared up position to a partially reared up position                                                              | Come Down to PR              |
| Dig                               | Any movement with animal's hind limbs inside bedding and resulting in a considerable movement of the bedding                                              | Dig                          |
| Drink                             | In a reared up position. animal's nose/mouth crosses water calibrated line                                                                                | Drink                        |
| Eat                               | In a reared up position, animal's nose/mouth crosses feeding box calibrated line                                                                          | Eat                          |
| Forage                            | Any movement with animal's forepaws and/or mouth inside bedding and resulting in a considerable movement of the bedding, typically in front of the animal | Forage                       |
| Groom                             | Deformation of body over a defined criteria and longer than specified time                                                                                | Groom                        |
| Hang cuddled                      | Any movement of the animal resulting in animal having all four limbs at the top of the cage (more horizontal position at the top of the cage)             | Hang Cuddled                 |
| Hang vertically from hang cuddled | Any movement from a hang cuddled position to a hang vertical position                                                                                     | Hang Ver from Hanged Cuddled |
| Hang vertically from rear up      | Any movement of the animal resulting in animal leaving the floor and not coming back down immediately and remaining vertical after leaving the floor      | Hang Ver From RearUp         |
| Jump                              | Any movement from a lower to a higher position and back to the position                                                                                   | Jump                         |
| Land vertically                   | Any movement of the animal from a hanging position with feet off of the floor to the feet coming back down on to the floor                                | Land Ver                     |
| Pause                             | Implemented similar to sleep with those sleep constraints, but lasting only for much smaller prescribed minimum time                                      | Pause                        |
| Rear up                           | Any movement of the animal from a low position to a full reared up position                                                                               | RearUp                       |
| Rear up from partially reared     | Any movement of the animal from a partially reared position to a fully reared up position                                                                 | ReaurUp from PR              |
| Rear up partially                 | Any movement of the animal from position to a partially reared position                                                                                   | RearUp Part                  |
| Remain hang cuddled               | After hanging cuddled, remain in a hanging cuddled position                                                                                               | Remain Hang Cuddled          |
| Remain hang vertically            | After hanging vertically remain in a vertical position                                                                                                    | Remain Hang Ver              |
| Remain partially reared           | Remain in a partially reared position                                                                                                                     | Remain PR                    |
| Remain reared up                  | After rearing up, remain in the reared up position                                                                                                        | Remain RearUp                |
| Repetitive jumping                | Any series of successive jump behaviors                                                                                                                   | Repetitive jump              |
| Sleep                             | The onset of sleep is detected at each instance there is no significant movement for a prescribed amount of time                                          | Sleep                        |
| Sniff                             | When the animal is either fully or partially reared, and the tip of the mouth makes some random movements (back and forth, up/down, protrude/retract)     | Sniff                        |
| Stationary                        | Any sequence for which there is no translational movement                                                                                                 | Stationary                   |
| Stretch body                      | Any movement from shorter to longer/elongated body (horizontally or vertically)                                                                           | Stretch                      |
| Turn                              | Any movement of the animal from a side view to a front vice versa                                                                                         | Turn                         |
| Twitch                            | Any brief movement of the animal during sleep                                                                                                             | Twitch                       |
| Walk left                         | Any movement of the animal in left direction over a given distance                                                                                        | Walk L                       |
| Walk right                        | Any movement of the animal in right direction over a given distance                                                                                       | Walk R                       |
| Walk slowly                       | Any sideways movement of animal without a definite direction component                                                                                    | Walk S                       |
